# Supplementary material
Source: Research Square preprint supplement (doi:10.21203/rs.3.rs-10061692/v1)
Supplement: Supplementary file 1 [file 6f49cff67a302f6bafb00581.docx]

**Appendix 1:**

Table 2. Estimates from the full mixed-effects model for cognitive function

| Variable | (1) | (2) | (3) | (4) |
| --- | --- | --- | --- | --- |
| Cognitive function | Cognitive function | Cognitive function | Cognitive function |
| Long-term no union | -1.219*** | -0.919*** | -0.831*** | -0.809*** |
|  | (0.256) | (0.217) | (0.214) | (0.212) |
| Later-entry stable first union | 0.916*** | -0.421*** | -0.421*** | -0.439*** |
|  | (0.127) | (0.119) | (0.119) | (0.118) |
| Stable first union followed by later-life widowhood | -0.851*** | -0.142 | -0.061 | -0.103 |
|  | (0.178) | (0.147) | (0.148) | (0.147) |
| Early/midlife widowhood | -1.551*** | -0.097 | -0.001 | -0.052 |
|  | (0.283) | (0.249) | (0.247) | (0.247) |
| Remarriage/re-partnering | -1.544*** | -0.814*** | -0.827*** | -0.822*** |
|  | (0.220) | (0.186) | (0.186) | (0.183) |
| Years since 2011 | -0.107*** | -0.112*** | -0.112*** | -0.112*** |
|  | (0.008) | (0.008) | (0.008) | (0.008) |
| Long-term no union # Years since 2011 | -0.002 | -0.006 | -0.004 | -0.006 |
|  | (0.051) | (0.049) | (0.049) | (0.049) |
| Later-entry stable first union # Years since 2011 | 0.043** | 0.048** | 0.048** | 0.048** |
|  | (0.016) | (0.016) | (0.016) | (0.016) |
| Stable first union followed by later-life widowhood # Years since 2011 | -0.023 | -0.029 | -0.029 | -0.029 |
|  | (0.023) | (0.023) | (0.023) | (0.023) |
| Early/midlife widowhood # Years since 2011 | -0.066 | -0.084 | -0.085 | -0.084 |
|  | (0.046) | (0.046) | (0.046) | (0.046) |
| Remarriage/re-partnering # Years since 2011 | -0.000 | -0.012 | -0.012 | -0.012 |
|  | (0.032) | (0.032) | (0.032) | (0.032) |
| Female |  | -0.764*** | -0.762*** | -0.731*** |
|  |  | (0.082) | (0.081) | (0.081) |
| Age in 2011 |  | -0.118*** | -0.116*** | -0.116*** |
|  |  | (0.007) | (0.007) | (0.007) |
| Middle school |  | 2.591*** | 2.567*** | 2.549*** |
|  |  | (0.092) | (0.092) | (0.091) |
| High school or above |  | 3.919*** | 3.811*** | 3.757*** |
|  |  | (0.097) | (0.099) | (0.098) |
| Rural residence in 2011 |  | -0.938*** | -0.856*** | -0.817*** |
|  |  | (0.082) | (0.084) | (0.083) |
| Log income in 2011 |  |  | 0.099*** | 0.093*** |
|  |  |  | (0.017) | (0.017) |
| Health insurance in 2011 |  |  | 0.516** | 0.517** |
|  |  |  | (0.171) | (0.169) |
| Self-rated health in 2011 |  |  |  | 0.355*** |
|  |  |  |  | (0.043) |
| Constant | 0.803*** | 0.802*** | 0.802*** | 0.802*** |
|  | (0.008) | (0.008) | (0.008) | (0.008) |
| Demographic controls | No | Yes | Yes | Yes |
| Socioeconomic controls | No | No | Yes | Yes |
| Baseline health control | No | No | No | Yes |
| Observations | 16523 | 16523 | 16523 | 16523 |
| Individuals | 5033 | 5033 | 5033 | 5033 |
| Log likelihood | -41437.6 | -40301.5 | -40278.2 | -40242.6 |
